# Supplementary material
Source: publisher figshare collection journal article supplement (https://tandf.figshare.com/ndownloader/files/15565163)
Supplement: Supplementary file 1 [file 15565163]

Appendix

Table 1. Descriptive variables.

Education level refers to highest grade range completed: Less than primary school = 1; Primary school = 2; Junior high school = 3; High school= 4; College = 5; Higher than college = 6.

| Variable |  | Average value (SD) |  | Range |
| --- | --- | --- | --- | --- |
| Age (years) |  | 38.82 (8.81) |  | 21-72 |
| Education level |  | 3.22 (0.87) |  | 1-6 |
| Annual income (10,000 yuan) |  | 11.67 (17.52) |  | 0-500 |
| Driving experience (years) |  | 7.73 (6.12) |  | 1-40 |
| Daily mileage (km) |  | 60.93 (75.61) |  | 0-550 |
| Daily driving time (h) |  | 2.73 (3.31) |  | 0-15 |

Appendix

Table 2. Driving anger scale means and standard deviations.

| Item no. |  | Item |  | Mean (SD) |
| --- | --- | --- | --- | --- |
|  |  | **Discourtesy (α=0.89)** |  | 2.14 (0.88) |
| 14 |  | Someone coming towards you does not dim their headlights at night |  | 2.66 (1.35) |
| 7 |  | Someone cuts in front of you on motorway |  | 2.38 (1.39) |
| 15 |  | At night someone is driving right behind you with bright lights on |  | 2.32 (1.31) |
| 5 |  | Someone driving very close to your rear bumper |  | 2.16 (1.24) |
| 12 |  | Someone backs out right in front of you |  | 2.15 (1.19) |
| 20 |  | Someone pulls out right in front of you when there is no-one behind you |  | 2.12 (1.16) |
| 8 |  | Someone takes the parking spot you were waiting for |  | 2.11 (1.25) |
| 32 |  | Cyclist in the middle of the lane |  | 1.80 (1.04) |
| 17 |  | Someone speeds up when you try to pass them |  | 1.60 (0.93) |
|  |  | **Traffic obstructions (α=0.84)** |  | 1.81 (0.77) |
| 22 |  | Hit unmarked deep pothole |  | 2.36 (1.39) |
| 29 |  | Truck kicking up gravel |  | 2.21 (1.21) |
| 28 |  | Behind a badly smoking vehicle |  | 1.87 (1.11) |
| 25 |  | Behind a truck with material flapping around |  | 1.80 (1.08) |
| 30 |  | Behind a large truck you cannot see around |  | 1.69 (1.01) |
| 19 |  | Stuck in a traffic jam |  | 1.53 (0.85) |
| 31 |  | Road works or detours |  | 1.20 (0.61) |
|  |  | **Hostile gestures (α=0.85)** |  | 1.94 (1.04) |
| 21 |  | Someone makes an obscene gesture towards you |  | 2.21 (1.34) |
| 26 |  | Someone shouts at you |  | 1.88 (1.14) |
| 23 |  | Someone beeps at you |  | 1.74 (1.06) |
|  |  | **Slow driving (α=0.79)** |  | 1.60 (0.61) |
| 4 |  | Someone driving too slowly in the outside lane |  | 1.90 (1.02) |
| 10 |  | Slow vehicle on a winding road will not pull over |  | 1.78 (1.03) |
| 9 |  | Someone driving more slowly than is reasonable |  | 1.56 (0.87) |
| 18 |  | Someone slow in parking |  | 1.56 (0.84) |
| 1 |  | Someone does not move straight away when the lights green |  | 1.48 (0.71) |
| 3 |  | Pedestrian walks slowly across the street |  | 1.31 (0.70) |
|  |  | **Police presence (α=0.70)** |  | 1.27 (0.53) |
| 11 |  | Police car watching traffic from a hidden position |  | 1.50 (1.04) |
| 33 |  | Police driving close by |  | 1.21 (0.60) |
| 16 |  | Pass a speed camera |  | 1.20 (0.58) |
| 27 |  | Police officer pulls you over |  | 1.19 (0.60) |
|  |  | **Illegal driving (α=0.73)** |  | 2.01 (0.87) |
| 6 |  | Someone weaving in and out of traffic |  | 2.51 (1.34) |
| 13 |  | Someone runs a red light/stop sign |  | 2.25 (1.36) |
| 2 |  | Someone driving too fast for the road conditions |  | 1.67 (0.91) |
| 24 |  | Someone driving well above the speed limit |  | 1.62 (0.98) |
|  |  | **Total anger (α=0.95)** |  | 1.80 (0.64) |

|  |  | No. of items |  | USAa  *n* = 272 |  | UKb  *n* = 270 |  | New Zealandc  *n* =861 |  | Spaind  *n* = 371 |  | Turkeye  *n* = 200 |  | Francef  *n* = 202 |  | Malaysiag  *n* = 339 |  | Chinah  n = 411 |  | China  *n* =3101 |
| --- | --- | --- | --- | --- | --- | --- | --- | --- | --- | --- | --- | --- | --- | --- | --- | --- | --- | --- | --- | --- |
| Discourtesy |  | 9 |  | 3.90 |  | 2.68 (0.91)*** |  | 3.51 (0.77)*** |  | 3.36 (0.76)*** |  | 3.61 (0.74)*** |  | 3.64 (1.05)*** |  | 3.61 (0.77)*** |  | 2.62 (0.81)*** |  | 2.14 (0.88) |
| Traffic obstructions |  | 7 |  | 3.30 |  | 2.00 (0.94)** |  | 2.69 (0.82)*** |  | 2.77 (0.74)*** |  | 3.10 (0.83)*** |  | 2.79 (1.15)*** |  | 3.29 (0.92)*** |  | 2.70 (0.87)*** |  | 1.81 (0.77) |
| Hostile gestures |  | 3 |  | 3.20 |  | 2.27 (0.86)*** |  | 2.73 (1.07)*** |  | 2.68 (1.07)*** |  | 3.42 (0.96)*** |  | 3.36 (1.27)*** |  | 3.45 (1.09)*** |  | 2.68 (0.94)*** |  | 1.94 (1.04) |
| Slow driving |  | 6 |  | 3.20 |  | 1.98 (1.00)*** |  | 2.77 (1.86)*** |  | 2.32 (0.61)*** |  | 2.88 (0.77)*** |  | 2.55 (1.02)*** |  | 3.06 (0.82)*** |  | 2.39 (0.79)*** |  | 1.60 (0.61) |
| Police presence |  | 4 |  | 3.00 |  | 1.36 (0.92) |  | 1.86 (0.86)*** |  | 2.00 (0.99)*** |  | 2.22 (0.98) *** |  | 1.85 (1.11)*** |  | 2.25 (0.98)*** |  | 2.32 (0.87)*** |  | 1.27 (0.53) |
| Illegal driving |  | 4 |  | 2.70 |  | 2.26 (0.93)*** |  | 3.28 (0.97)*** |  | 3.46 (0.88)*** |  | 3.50 (0.88)*** |  | 3.02 (1.33)*** |  | 2.75 (0.95)*** |  | 2.54 (0.85)*** |  | 2.01 (0.87) |

Appendix

Table 3. Driving anger scale means and standard deviations across various samples.

Summary t-tests with Chinese data: ***p ≤ 0.001, **p ≤ 0.01, *p ≤ 0.05.

a Deffenbacher et al. (1994).

b Lajunen et al. (1998).

c Sullman (2006).

d Sullman et al. (2007).

e Yasak and Es¸iyol (2009).

f Villieux and Delhomme (2007).

g Sullman et al.(2014).

h Li et al.(2014)

Appendix

**REFERENCES**

Berdoulat E, Vavassori D, Sastre MT. Driving anger, emotional and instrumental aggressiveness, and impulsiveness in the prediction of aggressive and transgressive driving. *Accid Anal Prev*. 2013;50:758-767.

Brandenburg S, Oehl M, Seigies K. German Taxi Drivers' Experience and Expression of Driving Anger: Are the Driving Anger Scale and the Driving Anger Expression Inventory Valid Measures?[J]. *Traffic Inj Prev*, 2017, 18(8): 807-812.

Chow, Siu L. Significance test or effect size?[J]. *Psychol Bull*. 1988, 103(1):105-110.

Deffenbacher JL, Deffenbacher DM, Lynch RS, Richards TL. Anger, aggression, and risky behavior: a comparison of high and low anger drivers. *Behav Res Ther*. 2003;41:701-718.

Deffenbacher JL, Huff ME, Lynch RS, Oetting ER, Salvatore NF. Characteristics and treatment of high-anger drivers. *J Couns Psychol*. 2000;47:5-17.

Dahlen ER, Ragan KM. Validation of the propensity for angry driving scale. *J Safety Res.*2004;35:557-563.

Hu LT, Bentler PM. Cutoff Criteria for Fit Indexes in Covariance Structure Analysis: Conventional Criteria Versus New Alternatives[J]. Struct Equ Modeling,1999,6(1):1-55.

Lee WK, Lee HA, Hwang SS, et al. Does temperature modify the effects of rain and snow precipitation on road traffic injuries? *J Epidemiol.* 2015;25:544-552.

Levulyte L, Baranyai D, Torok A, Sokolovskij E. Bicycles’ role in road accidents a review of literature. *Transp Telecommun J*. 2016;17:122-127.

Liu R, Zhou R, Oeh M. Driving angry behavior of drivers in mainland China and Germany. *Chin J Ergon*. 2013;19:10-15.

Mesken J, Hagenzieker MP, Rothengatter T, Waard DD. Frequency, determinants, and consequences of different drivers’ emotions: An on-the-road study using self-reports, (observed) behaviour, and physiology. *Transp Res Part F Trafc Psychol Behav*.2007;10:458-475.

Nantulya VM, Reich MR. Equity dimensions of road traffic injuries in low- and middle-income countries. *Inj Control Saf Promot*. 2003;10:13-20.

Przepiorka AM, Blachnio A, Wiesenthal DL. The determinants of driving aggression among polish drivers. Transp Res Part F Trafc Psychol Behav. 2014;27:69-80.

Rosenbloom T, Shahar A. Differences between taxi and nonprofessional male drivers in attitudes towards traffic-violation penalties[J]. *Transp Res Part F Trafc Psychol Behav.* 2007, 10(5):0-435.

Stephens AN, Groeger JA. Anger-congruent behaviour transfers across driving situations. *Cogn Emot*. 2011;25(8):1423-1438.

Underwood G, Chapman P, Wright S, Crundal D. Anger while driving. *Transp Res Part F Trafc Psychol Behav.* 1999;2:55-68.
